# Supplementary material
Source: Springer Nature journal article supplement (https://www.springermedizin.de/resource/supplementary/12936_2013_3071_MOESM1_ESM.pdf/9546186)

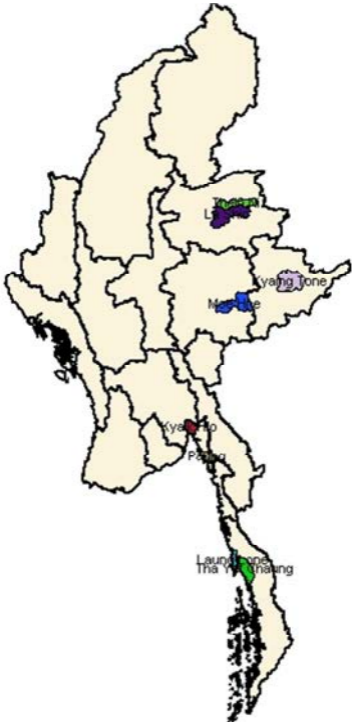

Lashio

Kyang Lone

Mawlaikhe

Kya Pho

Pagan

Laung Lone  
Tha Yar

Supplement: MOESM1 [file 9546186]
